# Supplementary material for: The Role of the Component Metals in the Toxicity of Military-Grade Tungsten Alloy
Source: PubMed Central journal article supplement (PMC5606641; doi:10.3390/toxics3040499), 2015-12-08
Supplement: toxics-03-00499-s001.pdf [file toxics-03-00499-s001.pdf]

## Supplementary Information

**Table S1.** Hematological parameters of 1-month implantation groups.

| Group  | WBC ( $10^3/\mu\text{L}$ ) | RBC ( $10^6/\mu\text{L}$ ) | HGB (g/dL)   | HCT (%)        | PLT ( $10^3/\mu\text{L}$ ) | Lymphocytes $10^3/\mu\text{L}$ | Monocytes $10^3/\mu\text{L}$ | Granulocytes $10^3/\mu\text{L}$ |
|--------|----------------------------|----------------------------|--------------|----------------|----------------------------|--------------------------------|------------------------------|---------------------------------|
| Sham   | 4.60 ± 0.35                | 9.42 ± 0.12                | 14.50 ± 0.16 | 45.48 ± 0.47   | 892.4 ± 5.9                | 2.76 ± 0.22                    | 0.50 ± 0.05                  | 1.34 ± 0.09                     |
| Ta     | 4.97 ± 0.96                | 8.54 ± 0.17                | 14.07 ± 0.27 | 41.51 ± 0.88 * | 726.3 ± 51.1               | 2.34 ± 0.28                    | 0.46 ± 0.06                  | 2.17 ± 0.66                     |
| WTa    | 3.86 ± 0.52                | 9.28 ± 0.09                | 14.38 ± 0.20 | 41.15 ± 4.01   | 785.9 ± 85.5               | 1.90 ± 0.21 *                  | 0.39 ± 0.05                  | 1.57 ± 0.28                     |
| NiTa   | 6.13 ± 0.40 *              | 9.05 ± 0.13                | 14.13 ± 0.19 | 44.31 ± 0.62   | 963.2 ± 44.5               | 2.67 ± 0.21                    | 0.62 ± 0.05                  | 2.84 ± 0.23 *                   |
| CoTa   | 5.28 ± 0.65                | 8.53 ± 0.55                | 12.97 ± 0.91 | 41.33 ± 2.64   | 936.1 ± 69.8               | 2.18 ± 0.25                    | 0.48 ± 0.06                  | 2.62 ± 0.48                     |
| WNTa   | 5.89 ± 0.90                | 9.31 ± 0.24                | 14.23 ± 0.36 | 44.13 ± 1.11   | 901.0 ± 69.0               | 2.24 ± 0.25                    | 0.47 ± 0.06                  | 3.18 ± 0.76                     |
| WCoTa  | 5.46 ± 0.51                | 9.03 ± 0.15                | 14.24 ± 0.23 | 43.77 ± 0.62   | 981.8 ± 42.1               | 2.48 ± 0.23                    | 0.52 ± 0.05                  | 2.46 ± 0.30 *                   |
| NiCoTa | 5.37 ± 0.39                | 9.52 ± 0.16                | 15.09 ± 0.20 | 46.11 ± 0.77   | 868.8 ± 24.1               | 2.57 ± 0.22                    | 0.49 ± 0.03                  | 2.31 ± 0.19 *                   |

Data represent the mean and standard error of the mean of 10 independent observations. An \* indicates a result that is statistically different from the control (sham) at  $p < 0.05$  using a one-way ANOVA followed by Dunnett's test for group mean comparisons. WBC, white blood cells; RBC, red blood cells; HGB, hemoglobin; HCT, hematocrit; PLT, platelets.

**Table S2.** Hematological parameters of 3-month implantation groups.

| Group  | WBC ( $10^3/\mu\text{L}$ ) | RBC ( $10^6/\mu\text{L}$ ) | HGB (g/dL)     | HCT (%)        | PLT ( $10^3/\mu\text{L}$ ) | Lymphocytes $10^3/\mu\text{L}$ | Monocytes $10^3/\mu\text{L}$ | Granulocytes $10^3/\mu\text{L}$ |
|--------|----------------------------|----------------------------|----------------|----------------|----------------------------|--------------------------------|------------------------------|---------------------------------|
| Sham   | 4.09 ± 0.51                | 8.60 ± 0.19                | 13.16 ± 0.25   | 40.55 ± 0.89   | 1070.1 ± 75.4              | 2.13 ± 0.31                    | 0.22 ± 0.04                  | 1.71 ± 0.28                     |
| Ta     | 4.29 ± 0.50                | 9.26 ± 0.13 *              | 14.13 ± 0.14 * | 44.90 ± 0.65 * | 864.3 ± 26.0 *             | 1.70 ± 0.07                    | 0.34 ± 0.03 *                | 2.24 ± 0.48                     |
| WTa    | 3.79 ± 0.34                | 8.83 ± 0.15                | 13.69 ± 0.23   | 43.18 ± 0.75   | 805.9 ± 67.9 *             | 1.78 ± 0.22                    | 0.38 ± 0.04 *                | 1.63 ± 0.19                     |
| NiTa   | 4.66 ± 0.40                | 8.87 ± 0.20                | 13.39 ± 0.29   | 43.11 ± 1.06   | 901.9 ± 32.1               | 1.97 ± 0.16                    | 0.46 ± 0.04 *                | 2.23 ± 0.24                     |
| CoTa   | 5.03 ± 0.36                | 9.02 ± 0.21                | 14.03 ± 0.29   | 43.54 ± 1.02   | 1111.1 ± 58.2              | 2.33 ± 0.26                    | 0.55 ± 0.04 *                | 2.15 ± 0.23                     |
| WNTa   | 5.31 ± 0.49                | 9.19 ± 0.05                | 14.28 ± 0.10 * | 44.22 ± 0.29 * | 1006.3 ± 35.5              | 2.31 ± 0.20                    | 0.49 ± 0.05 *                | 2.51 ± 0.35                     |
| WCoTa  | 5.16 ± 0.50                | 8.95 ± 0.09                | 14.17 ± 0.14 * | 43.07 ± 0.47 * | 1094.4 ± 43.9              | 1.70 ± 0.15                    | 0.39 ± 0.03 *                | 3.07 ± 0.52                     |
| NiCoTa | 5.13 ± 0.31                | 9.02 ± 0.14                | 13.97 ± 0.19 * | 43.24 ± 0.73   | 1010.3 ± 49.3              | 2.40 ± 0.18                    | 0.56 ± 0.05 *                | 2.19 ± 0.13                     |

Data represent the mean and standard error of the mean of 10 independent observations. An \* indicates a result that is statistically different from the control (sham) at  $p < 0.05$  using a one-way ANOVA followed by Dunnett's test for group mean comparisons.

**Table S3.** Hematological parameters of 6-month implantation groups.

| Group  | WBC ( $10^3/\mu\text{L}$ ) | RBC ( $10^6/\mu\text{L}$ ) | HGB (g/dL)     | HCT (%)        | PLT ( $10^3/\mu\text{L}$ ) | Lymphocytes $10^3/\mu\text{L}$ | Monocytes $10^3/\mu\text{L}$ | Granulocytes $10^3/\mu\text{L}$ |
|--------|----------------------------|----------------------------|----------------|----------------|----------------------------|--------------------------------|------------------------------|---------------------------------|
| Sham   | 3.79 ± 0.36                | 8.46 ± 0.11                | 13.09 ± 0.16   | 39.75 ± 0.64   | 1159.2 ± 71.6              | 2.33 ± 0.30                    | 0.19 ± 0.04                  | 1.23 ± 0.12                     |
| Ta     | 4.86 ± 0.74                | 8.99 ± 0.11 *              | 13.77 ± 0.23   | 47.33 ± 0.67 * | 988.4 ± 57.0               | 1.92 ± 0.29                    | 0.34 ± 0.04 *                | 2.59 ± 0.77                     |
| WTa    | 4.71 ± 0.34                | 9.01 ± 0.15 *              | 13.88 ± 0.10 * | 43.76 ± 0.38 * | 967.4 ± 44.3               | 2.36 ± 0.24                    | 0.49 ± 0.05 *                | 1.86 ± 0.10 *                   |
| NiTa   | 13.82 ± 8.30               | 8.50 ± 0.34                | 12.91 ± 0.56   | 40.69 ± 1.50   | 847.0 ± 138.6              | 1.77 ± 0.23                    | 0.53 ± 0.14                  | 11.53 ± 8.13                    |
| CoTa   | 5.98 ± 0.98                | 8.99 ± 0.11 *              | 13.62 ± 0.15   | 42.60 ± 0.49 * | 1114.8 ± 35.1              | 2.26 ± 0.24                    | 0.51 ± 0.05 *                | 3.21 ± 0.86                     |
| WNTa   | 6.23 ± 0.96                | 8.75 ± 0.10                | 13.75 ± 0.17   | 41.98 ± 0.51 * | 1091.7 ± 54.2              | 2.14 ± 0.22                    | 0.44 ± 0.03 *                | 3.65 ± 1.01                     |
| WCoTa  | 4.11 ± 0.41                | 9.14 ± 0.16 *              | 14.34 ± 0.21 * | 43.94 ± 0.76 * | 990.0 ± 41.4               | 1.93 ± 0.27                    | 0.39 ± 0.05 *                | 1.79 ± 0.14 *                   |
| NiCoTa | 4.43 ± 0.29                | 9.00 ± 0.11 *              | 14.30 ± 0.11 * | 43.26 ± 0.46 * | 1021.6 ± 59.3              | 2.10 ± 0.15                    | 0.40 ± 0.02 *                | 1.93 ± 0.15 *                   |

Data represent the mean and standard error of the mean of 10 independent observations. An \* indicates a result that is statistically different from the control (sham) at  $p < 0.05$  using a one-way ANOVA followed by Dunnett's test for group mean comparisons.

**Table S4.** Hematological parameters of 12-month implantation groups.

| Group  | WBC ( $10^3/\mu\text{L}$ ) | RBC ( $10^6/\mu\text{L}$ ) | HGB (g/dL)     | HCT (%)        | PLT ( $10^3/\mu\text{L}$ ) | Lymphocytes $10^3/\mu\text{L}$ | Monocytes $10^3/\mu\text{L}$ | Granulocytes $10^3/\mu\text{L}$ |
|--------|----------------------------|----------------------------|----------------|----------------|----------------------------|--------------------------------|------------------------------|---------------------------------|
| Sham   | 6.65 ± 0.36                | 8.50 ± 0.26                | 13.89 ± 0.19   | 42.65 ± 0.48   | 1256.5 ± 60.2              | 3.45 ± 0.30                    | 0.33 ± 0.05                  | 1.55 ± 0.20                     |
| Ta     | 6.06 ± 0.96                | 8.89 ± 0.20                | 13.80 ± 0.27   | 42.57 ± 0.79   | 1205.4 ± 70.5              | 2.52 ± 0.34                    | 0.43 ± 0.06                  | 3.10 ± 0.65                     |
| WTa    | 5.23 ± 0.74                | 8.58 ± 0.70                | 12.95 ± 1.06   | 40.65 ± 3.47   | 1030.6 ± 34.0 *            | 2.67 ± 0.44                    | 0.44 ± 0.08                  | 2.12 ± 0.22                     |
| NiTa   | 5.19 ± 0.49                | 8.81 ± 0.10                | 13.20 ± 0.21   | 41.76 ± 0.61   | 990.7 ± 28.1 *             | 2.11 ± 0.19 *                  | 0.34 ± 0.03                  | 2.73 ± 0.35                     |
| CoTa   | 5.27 ± 0.61                | 8.28 ± 0.15                | 12.53 ± 0.20 * | 39.31 ± 0.62 * | 910.2 ± 20.3 *             | 1.79 ± 0.24 *                  | 0.33 ± 0.04                  | 3.14 ± 0.45 *                   |
| WNTa   | 5.47 ± 0.39                | 9.24 ± 0.11 *              | 13.83 ± 0.19   | 44.00 ± 0.63   | 1048.3 ± 25.6 *            | 2.60 ± 0.27                    | 0.48 ± 0.03 *                | 2.40 ± 0.11                     |
| WCoTa  | 5.66 ± 0.78                | 8.16 ± 0.77                | 12.50 ± 1.17   | 38.82 ± 3.72   | 929.0 ± 37.3 *             | 2.88 ± 0.43                    | 0.48 ± 0.07                  | 2.30 ± 0.29                     |
| NiCoTa | 4.40 ± 0.60                | 8.82 ± 0.07                | 13.10 ± 0.17   | 41.10 ± 0.41   | 716.0 ± 55.1               | 2.30 ± 0.30                    | 0.30 ± 0.06 *                | 1.80 ± 0.27                     |

Data represent the mean and standard error of the mean of 10 independent observations. An \* indicates a result that is statistically different from the control (sham) at  $p < 0.05$  using a one-way ANOVA followed by Dunnett's test for group mean comparisons.

**Table S5.** Hematological parameters of 24-month implantation groups.

| Group  | WBC ( $10^3/\mu\text{L}$ ) | RBC ( $10^6/\mu\text{L}$ ) | HGB (g/dL)   | HCT (%)      | PLT ( $10^3/\mu\text{L}$ ) | Lymphocytes $10^3/\mu\text{L}$ | Monocytes $10^3/\mu\text{L}$ | Granulocytes $10^3/\mu\text{L}$ |
|--------|----------------------------|----------------------------|--------------|--------------|----------------------------|--------------------------------|------------------------------|---------------------------------|
| Sham   | 8.66 ± 1.00                | 8.47 ± 0.36                | 12.86 ± 0.52 | 39.18 ± 1.65 | 1124.1 ± 74.6              | 2.74 ± 0.43                    | 0.58 ± 0.13                  | 5.35 ± 0.85                     |
| Ta     | 7.16 ± 0.83                | 9.66 ± 0.49                | 13.89 ± 0.55 | 43.14 ± 1.87 | 1085.6 ± 72.4              | 2.19 ± 0.32                    | 0.43 ± 0.06                  | 4.53 ± 0.66                     |
| WTa    | 6.34 ± 0.38                | 8.72 ± 0.59                | 12.98 ± 0.72 | 39.83 ± 2.35 | 1146.5 ± 108.4             | 2.16 ± 0.23                    | 0.39 ± 0.03                  | 3.79 ± 0.32                     |
| NiTa   | 11.61 ± 4.99               | 8.74 ± 0.55                | 12.88 ± 0.54 | 39.68 ± 2.00 | 1154.7 ± 79.8              | 2.96 ± 0.47                    | 0.54 ± 0.12                  | 3.70 ± 0.57                     |
| CoTa   | 8.54 ± 1.27                | 8.90 ± 0.45                | 13.12 ± 0.58 | 40.58 ± 1.94 | 1103.5 ± 84.5              | 2.33 ± 0.25                    | 0.42 ± 0.05                  | 5.79 ± 1.23                     |
| WNIa   | 6.93 ± 0.86                | 8.39 ± 0.36                | 13.09 ± 0.40 | 39.65 ± 1.31 | 1045.1 ± 77.4              | 2.64 ± 0.29                    | 0.51 ± 0.07                  | 3.78 ± 0.58                     |
| WCoTa  | 6.88 ± 0.95                | 8.62 ± 0.58                | 12.64 ± 0.61 | 39.31 ± 2.04 | 1038.4 ± 112.5             | 2.30 ± 0.31                    | 0.96 ± 0.51                  | 4.09 ± 0.73                     |
| NiCoTa | 8.87 ± 1.48                | 7.87 ± 0.46                | 12.14 ± 0.67 | 37.57 ± 2.14 | 1011.5 ± 116.6             | 3.01 ± 0.62                    | 0.62 ± 0.18                  | 5.63 ± 0.90                     |

Data represent the mean and standard error of the mean of 10 independent observations. An \* indicates a result that is statistically different from the control (sham) at  $p < 0.05$  using a one-way ANOVA followed by Dunnett's test for group mean comparisons.

**Table S6.** Organ body weight ratios from mice in 1-month implantation groups.

| Group  | Spleen/BW (mg/gm) | Kidney/BW (mg/gm) | Liver/BW (mg/gm) | Testes/BW (mg/gm) |
|--------|-------------------|-------------------|------------------|-------------------|
| Sham   | 2.63 ± 0.10       | 14.96 ± 0.20      | 46.54 ± 0.65     | 6.97 ± 0.24       |
| Ta     | 2.92 ± 0.19       | 14.39 ± 0.23      | 51.05 ± 1.36 *   | 6.66 ± 0.14       |
| WTa    | 2.82 ± 0.19       | 14.78 ± 0.23      | 47.72 ± 0.55     | 7.02 ± 0.14       |
| NiTa   | 3.33 ± 0.23 *     | 14.89 ± 0.16      | 48.89 ± 0.87 *   | 6.27 ± 0.57       |
| CoTa   | 4.13 ± 0.56 *     | 15.30 ± 0.22      | 49.39 ± 1.25 *   | 6.79 ± 0.22       |
| WNIa   | 3.15 ± 0.21       | 14.29 ± 0.21      | 49.70 ± 0.70     | 6.50 ± 0.26       |
| WCoTa  | 3.51 ± 0.46       | 14.73 ± 0.40      | 49.27 ± 1.37 *   | 6.75 ± 0.25       |
| NiCoTa | 2.64 ± 0.09       | 14.30 ± 0.23      | 46.31 ± 0.38     | 6.31 ± 0.39       |

Data are the mean of 10 independent observations. Error the represents standard error of the mean. An \* indicates a result that is statistically different from the control (sham) at  $p < 0.05$  using one-way ANOVA followed by Dunnett's test for group mean comparisons.

**Table S7.** Organ body weight ratios from mice in 3-month implantation groups.

| Group  | Spleen/BW (mg/gm) | Kidney/BW (mg/gm) | Liver/BW (mg/gm) | Testes/BW (mg/gm) |
|--------|-------------------|-------------------|------------------|-------------------|
| Sham   | 3.02 ± 0.23       | 13.44 ± 0.34      | 45.16 ± 0.69     | 6.52 ± 0.15       |
| Ta     | 2.55 ± 0.19       | 13.25 ± 0.24      | 47.14 ± 1.04     | 5.96 ± 0.08 *     |
| WTa    | 2.49 ± 0.14       | 13.08 ± 0.28      | 46.73 ± 1.04     | 5.82 ± 0.14 *     |
| NiTa   | 3.01 ± 0.24       | 14.09 ± 0.31      | 49.43 ± 1.52 *   | 5.88 ± 0.1 *      |
| CoTa   | 3.21 ± 0.23       | 13.65 ± 0.31      | 49.41 ± 1.03 *   | 6.13 ± 0.33       |
| WNIa   | 2.64 ± 0.15       | 12.82 ± 0.17      | 43.47 ± 4.24     | 5.89 ± 0.09 *     |
| WCoTa  | 3.57 ± 0.32       | 14.25 ± 0.19      | 47.43 ± 0.98     | 5.97 ± 0.11 *     |
| NiCoTa | 2.43 ± 0.10       | 12.99 ± 0.30      | 45.94 ± 0.75     | 6.17 ± 0.24       |

Data are the mean of 10 independent observations. Error represents the standard error of the mean. An \* indicates a result that is statistically different from the control (sham) at  $p < 0.05$  using one-way ANOVA followed by Dunnett's test for group mean comparisons.

**Table S8.** Organ body weight ratios from mice in 6-month implantation groups.

| Group  | Spleen/BW (mg/gm) | Kidney/BW (mg/gm) | Liver/BW (mg/gm) | Testes/BW (mg/gm) |
|--------|-------------------|-------------------|------------------|-------------------|
| Sham   | 2.44 ± 0.19       | 12.62 ± 0.31      | 41.84 ± 1.22     | 5.56 ± 0.15       |
| Ta     | 2.85 ± 0.28       | 16.37 ± 3.32      | 43.96 ± 0.75     | 5.39 ± 0.15       |
| WTa    | 2.58 ± 0.14       | 13.98 ± 0.41 *    | 46.38 ± 0.69 *   | 5.67 ± 0.17       |
| NiTa   | 2.47 ± 0.20       | 14.18 ± 0.67      | 49.28 ± 2.61     | 5.72 ± 0.12       |
| CoTa   | 3.10 ± 0.40       | 13.57 ± 0.26      | 47.23 ± 0.96 *   | 5.56 ± 0.14       |
| WNIa   | 2.72 ± 0.24       | 13.75 ± 0.29 *    | 46.90 ± 1.45 *   | 5.51 ± 0.14       |
| WCoTa  | 2.02 ± 0.06       | 12.86 ± 0.39      | 41.19 ± 1.04     | 5.48 ± 0.13       |
| NiCoTa | 2.50 ± 0.17       | 12.97 ± 0.22      | 47.91 ± 1.32 *   | 5.10 ± 0.08       |

Data are the mean of 10 independent observations. Error represents the standard error of the mean. An \* indicates a result that is statistically different from the control (sham) at  $p < 0.05$  using one-way ANOVA followed by Dunnett's test for group mean comparisons.

**Table S9.** Organ body weight ratios from mice in 12-month implantation groups.

| Group  | Spleen/BW (mg/gm) | Kidney/BW (mg/gm) | Liver/BW (mg/gm) | Testes/BW (mg/gm) |
|--------|-------------------|-------------------|------------------|-------------------|
| Sham   | 2.52 ± 0.12       | 13.28 ± 0.29      | 44.54 ± 1.35     | 4.88 ± 0.09       |
| Ta     | 2.77 ± 0.24       | 13.52 ± 0.35      | 43.80 ± 0.86     | 4.66 ± 0.16       |
| WTa    | 2.22 ± 0.25       | 13.42 ± 0.56      | 43.62 ± 1.34     | 4.48 ± 0.13 *     |
| NiTa   | 3.82 ± 1.45       | 13.69 ± 0.29      | 45.08 ± 0.79     | 5.33 ± 0.15 *     |
| CoTa   | 2.33 ± 0.14       | 13.59 ± 0.45      | 43.12 ± 1.16     | 4.99 ± 0.18       |
| WNIa   | 2.40 ± 0.15       | 13.36 ± 0.41      | 46.31 ± 1.35     | 4.83 ± 0.14       |
| WCoTa  | 2.23 ± 0.10       | 13.53 ± 0.43      | 45.15 ± 1.11     | 5.07 ± 0.11       |
| NiCoTa | 2.29 ± 0.08       | 13.27 ± 0.28      | 44.09 ± 0.63     | 4.37 ± 0.33       |

Data are the mean of 10 independent observations. Error represents the standard error of the mean. An \* indicates a result that is statistically different from the control (sham) at  $p < 0.05$  using one-way ANOVA followed by Dunnett's test for group mean comparisons.

**Table S10.** Organ body weight ratios from mice in 24-month implantation groups.

| Group  | Spleen/BW (mg/gm) | Kidney/BW (mg/gm) | Liver/BW (mg/gm) | Testes/BW (mg/gm) |
|--------|-------------------|-------------------|------------------|-------------------|
| Sham   | 6.25 ± 1.89       | 12.77 ± 0.41      | 52.92 ± 4.51     | 4.43 ± 0.10       |
| Ta     | 9.09 ± 2.27       | 15.44 ± 0.80 *    | 60.91 ± 4.11     | 4.59 ± 0.13       |
| WTa    | 9.57 ± 5.62       | 14.06 ± 0.29      | 59.87 ± 8.50     | 4.91 ± 0.15 *     |
| NiTa   | 5.25 ± 1.20       | 13.66 ± 0.36      | 63.90 ± 8.37     | 4.72 ± 0.13       |
| CoTa   | 7.38 ± 1.52       | 13.94 ± 0.27 *    | 57.69 ± 5.87     | 4.70 ± 0.16       |
| WNiTa  | 3.76 ± 0.51       | 13.32 ± 0.48      | 47.35 ± 3.72     | 4.67 ± 0.18       |
| WCoTa  | 10.92 ± 4.67      | 13.72 ± 0.35      | 60.20 ± 6.43     | 4.78 ± 0.16       |
| NiCoTa | 6.95 ± 2.03       | 13.72 ± 0.27      | 53.25 ± 3.59     | 4.94 ± 0.16 *     |

Data are the mean of 20 independent observations. Error represents the standard error of the mean. An \* indicates a result that is statistically different from the control (sham) at  $p < 0.05$  using one-way ANOVA followed by Dunnett's test for group mean comparisons.

**Table S11.** Brain metal levels.

| 1-Month Groups |                |                |          |               |
|----------------|----------------|----------------|----------|---------------|
| Group          | Cobalt         | Nickel         | Tantalum | Tungsten      |
| Control        | 2.32 ± 0.15    | BD             | BD       | BD            |
| Ta             | 2.30 ± 0.12    | BD             | BD       | BD            |
| WTa            | 1.88 ± 0.06    | BD             | BD       | 2.48 ± 0.18 * |
| NiTa           | 2.05 ± 0.05    | BD             | BD       | BD            |
| CoTa           | 2.46 ± 0.16    | BD             | BD       | BD            |
| WNiTa          | 1.79 ± 0.07    | BD             | BD       | BD            |
| WCoTa          | 11.65 ± 0.72 * | BD             | BD       | 6.78 ± 0.77 * |
| NiCoTa         | 2.84 ± 0.20    | 10.87 ± 0.79 * | BD       | BD            |
| 3-Month Groups |                |                |          |               |
| Group          | Cobalt         | Nickel         | Tantalum | Tungsten      |
| Control        | 1.90 ± 0.04    | BD             | BD       | BD            |
| Ta             | 1.92 ± 0.02    | BD             | BD       | BD            |
| WTa            | 1.90 ± 0.02    | BD             | BD       | 1.62 ± 0.05 * |
| NiTa           | 1.95 ± 0.02    | BD             | BD       | BD            |
| CoTa           | 1.95 ± 0.01    | BD             | BD       | BD            |
| WNiTa          | 1.99 ± 0.01    | BD             | BD       | BD            |
| WCoTa          | 10.19 ± 0.10 * | BD             | BD       | 4.58 ± 0.31 * |
| NiCoTa         | 2.06 ± 0.01    | BD             | BD       | BD            |
| 6-Month Groups |                |                |          |               |
| Group          | Cobalt         | Nickel         | Tantalum | Tungsten      |
| Control        | 1.85 ± 0.02    | BD             | BD       | BD            |
| Ta             | 1.80 ± 0.01    | BD             | BD       | BD            |
| WTa            | 2.41 ± 0.02    | BD             | BD       | 1.63 ± 0.16 * |
| NiTa           | 2.32 ± 0.02    | BD             | BD       | BD            |
| CoTa           | 2.42 ± 0.03    | BD             | BD       | BD            |
| WNiTa          | 2.23 ± 0.03    | 3.91 ± 0.74 *  | BD       | 1.36 ± 0.31 * |
| WCoTa          | 9.98 ± 0.08 *  | 4.38 ± 0.91 *  | BD       | 4.42 ± 0.27 * |
| NiCoTa         | 2.32 ± 0.04    | BD             | BD       | BD            |

**Table S11. Cont.**

| <b>12-Month Groups</b> |               |                |          |               |
|------------------------|---------------|----------------|----------|---------------|
| Group                  | Cobalt        | Nickel         | Tantalum | Tungsten      |
| Control                | 1.93 ± 0.03   | BD             | BD       | BD            |
| Ta                     | 2.04 ± 0.09   | BD             | BD       | BD            |
| WTa                    | 2.12 ± 0.04   | BD             | BD       | 2.82 ± 0.21 * |
| NiTa                   | 2.11 ± 0.01   | 1.39 ± 0.26    | BD       | BD            |
| CoTa                   | 2.16 ± 0.05   | BD             | BD       | BD            |
| WNiTa                  | 2.40 ± 0.05   | BD             | BD       | 1.69 ± 0.24 * |
| WCoTa                  | 8.71 ± 0.16 * | BD             | BD       | 9.36 ± 1.68 * |
| NiCoTa                 | 2.25 ± 0.02   | 10.12 ± 1.53 * | BD       | BD            |
| <b>24-Month Groups</b> |               |                |          |               |
| Group                  | Cobalt        | Nickel         | Tantalum | Tungsten      |
| Control                | 2.92 ± 0.13   | BD             | BD       | BD            |
| Ta                     | 2.80 ± 0.06   | BD             | BD       | BD            |
| WTa                    | 3.04 ± 0.09   | BD             | BD       | 1.27 ± 0.42 * |
| NiTa                   | 2.67 ± 0.08   | BD             | BD       | BD            |
| CoTa                   | 2.75 ± 0.11   | BD             | BD       | BD            |
| WNiTa                  | 2.84 ± 0.05   | BD             | BD       | BD            |
| WCoTa                  | 6.02 ± 0.09 * | BD             | BD       | 3.12 ± 0.50 * |
| NiCoTa                 | 2.90 ± 0.07   | BD             | BD       | BD            |

All mice were implanted with 4 pellets of test metal. Data represent the mean and standard error of the mean of 10 independent measurements and are expressed as ng metal per g tissue. An \* indicates a result that is statistically different from the control (sham) at  $p < 0.05$  using one-way ANOVA. BD, below the limit of detection.

**Table S12. Femur metal levels.**

| <b>1-Month Groups</b> |                |        |                 |                    |
|-----------------------|----------------|--------|-----------------|--------------------|
| Group                 | Cobalt         | Nickel | Tantalum        | Tungsten           |
| Control               | BD             | BD     | BD              | BD                 |
| Ta                    | BD             | BD     | BD              | BD                 |
| WTa                   | BD             | BD     | 2.46 ± 0.36 *   | 357.70 ± 9.43 *    |
| NiTa                  | BD             | BD     | BD              | BD                 |
| CoTa                  | BD             | BD     | BD              | BD                 |
| WNiTa                 | BD             | BD     | 5.40 ± 0.75 *   | 111.17 ± 5.83 *    |
| WCoTa                 | BD             | BD     | 12.28 ± 1.11 *  | 479.13 ± 13.09 *   |
| NiCoTa                | BD             | BD     | BD              | BD                 |
| <b>3-Month Groups</b> |                |        |                 |                    |
| Group                 | Cobalt         | Nickel | Tantalum        | Tungsten           |
| Control               | BD             | BD     | BD              | BD                 |
| Ta                    | BD             | BD     | 17.02 ± 4.60 *  | BD                 |
| WTa                   | BD             | BD     | 44.78 ± 2.60 *  | 862.49 ± 59.45 *   |
| NiTa                  | BD             | BD     | 27.87 ± 2.35 *  | BD                 |
| CoTa                  | BD             | BD     | 11.62 ± 1.27 *  | BD                 |
| WNiTa                 | BD             | BD     | 24.45 ± 1.76 *  | 381.07 ± 29.72 *   |
| WCoTa                 | 27.83 ± 1.12 * | BD     | 112.84 ± 5.19 * | 1887.68 ± 133.50 * |
| NiCoTa                | BD             | BD     | 7.20 ± 0.25 *   | BD                 |

**Table S12. Cont.**

| <b>6-Month Groups</b>  |                |        |                  |                    |
|------------------------|----------------|--------|------------------|--------------------|
| Group                  | Cobalt         | Nickel | Tantalum         | Tungsten           |
| Control                | BD             | BD     | BD               | BD                 |
| Ta                     | BD             | BD     | BD               | BD                 |
| WTa                    | BD             | BD     | 56.14 ± 3.67 *   | 898.67 ± 38.95 *   |
| NiTa                   | BD             | BD     | 30.50 ± 1.39 *   | BD                 |
| CoTa                   | BD             | BD     | 8.36 ± 0.57 *    | BD                 |
| WNiTa                  | BD             | BD     | 32.94 ± 2.68 *   | 467.50 ± 22.32 *   |
| WCoTa                  | 37.07 ± 2.49 * | BD     | 161.83 ± 10.71 * | 2239.09 ± 76.62 *  |
| NiCoTa                 | BD             | BD     | 6.46 ± 0.63 *    | BD                 |
| <b>12-Month Groups</b> |                |        |                  |                    |
| Group                  | Cobalt         | Nickel | Tantalum         | Tungsten           |
| Control                | BD             | BD     | BD               | BD                 |
| Ta                     | BD             | BD     | BD               | BD                 |
| WTa                    | BD             | BD     | 26.67 ± 2.55 *   | 956.73 ± 51.26 *   |
| NiTa                   | BD             | BD     | 55.81 ± 8.90 *   | BD                 |
| CoTa                   | BD             | BD     | 43.45 ± 4.96 *   | BD                 |
| WNiTa                  | BD             | BD     | 50.33 ± 3.99 *   | 506.84 ± 38.48 *   |
| WCoTa                  | 24.74 ± 0.91 * | BD     | 233.55 ± 27.93 * | 4174.36 ± 718.84 * |
| NiCoTa                 | BD             | BD     | 7.39 ± 0.13 *    | BD                 |
| <b>24-Month Groups</b> |                |        |                  |                    |
| Group                  | Cobalt         | Nickel | Tantalum         | Tungsten           |
| Control                | BD             | BD     | BD               | BD                 |
| Ta                     | BD             | BD     | 2.81 ± 0.50 *    | BD                 |
| WTa                    | BD             | BD     | 16.15 ± 2.07 *   | 267.56 ± 27.34 *   |
| NiTa                   | BD             | BD     | 7.82 ± 1.69 *    | BD                 |
| CoTa                   | BD             | BD     | 3.01 ± 0.46 *    | BD                 |
| WNiTa                  | BD             | BD     | 66.63 ± 8.75 *   | 156.84 ± 12.05 *   |
| WCoTa                  | BD             | BD     | 142.32 ± 17.04 * | 631.02 ± 68.09 *   |
| NiCoTa                 | BD             | BD     | 2.22 ± 0.42 *    | BD                 |

All mice were implanted with 4 pellets of test metal. Data represent the mean and standard error of the mean of 10 independent measurements and are expressed as ng metal per g tissue. An \* indicates a result that is statistically different from the control (sham) at  $p < 0.05$  using one-way ANOVA. BD, below the limit of detection.

**Table S13. Kidney metal levels.**

| <b>1-Month Groups</b> |                  |                 |               |                  |
|-----------------------|------------------|-----------------|---------------|------------------|
| Group                 | Cobalt           | Nickel          | Tantalum      | Tungsten         |
| Control               | 36.44 ± 0.90     | 4.27 ± 0.97     | 2.20 ± 0.15   | BD               |
| Ta                    | 31.83 ± 0.86     | 1.77 ± 0.99     | 2.00 ± 0.13   | BD               |
| WTa                   | 54.51 ± 1.17 *   | 8.31 ± 1.81     | 4.18 ± 0.20 * | 128.68 ± 3.50 *  |
| NiTa                  | 49.02 ± 1.27 *   | 4.69 ± 0.60     | 3.78 ± 0.19 * | BD               |
| CoTa                  | 42.33 ± 2.49 *   | 3.97 ± 0.68     | 2.81 ± 0.18 * | BD               |
| WNiTa                 | 40.08 ± 1.01 *   | 121.69 ± 5.50 * | BD            | 64.13 ± 2.82 *   |
| WCoTa                 | 144.00 ± 10.17 * | 11.79 ± 0.99 *  | 1.68 ± 0.25   | 283.91 ± 11.58 * |
| NiCoTa                | 53.73 ± 2.04 *   | 10.49 ± 0.85 *  | BD            | BD               |

Table S13. *Cont.*

| <b>3-Month Groups</b>  |                 |                |                |                  |
|------------------------|-----------------|----------------|----------------|------------------|
| Group                  | Cobalt          | Nickel         | Tantalum       | Tungsten         |
| Control                | 42.67 ± 0.79    | 6.26 ± 0.39    | BD             | BD               |
| Ta                     | 50.95 ± 1.01 *  | 5.10 ± 0.50 *  | BD             | BD               |
| WTa                    | 43.74 ± 1.22    | 11.91 ± 0.50 * | 4.16 ± 0.24 *  | 129.69 ± 4.26 *  |
| NiTa                   | 39.38 ± 0.75    | 10.15 ± 0.34 * | 2.22 ± 0.13 *  | BD               |
| CoTa                   | 40.08 ± 1.44    | 11.67 ± 1.21 * | BD             | BD               |
| WNiTa                  | 44.63 ± 0.71    | 28.54 ± 2.64 * | 2.15 ± 0.24 *  | 70.42 ± 2.92 *   |
| WCoTa                  | 88.98 ± 2.07 *  | 5.01 ± 0.72    | 12.48 ± 0.72 * | 213.25 ± 14.13 * |
| NiCoTa                 | 39.72 ± 0.89    | 7.78 ± 0.97    | BD             | BD               |
| <b>6-Month Groups</b>  |                 |                |                |                  |
| Group                  | Cobalt          | Nickel         | Tantalum       | Tungsten         |
| Control                | 45.70 ± 1.66    | 3.06 ± 0.18    | BD             | BD               |
| Ta                     | 44.27 ± 1.72    | 2.21 ± 0.09 *  | BD             | BD               |
| WTa                    | 43.42 ± 2.14    | 8.32 ± 0.24 *  | 2.17 ± 0.23 *  | 112.20 ± 5.84 *  |
| NiTa                   | 38.35 ± 0.48    | 9.92 ± 0.14 *  | BD             | BD               |
| CoTa                   | 38.48 ± 1.29    | 10.86 ± 0.88 * | BD             | BD               |
| WNiTa                  | 41.81 ± 1.43    | 13.46 ± 1.08 * | 1.59 ± 0.29    | 71.45 ± 5.40 *   |
| WCoTa                  | 77.02 ± 1.24 *  | 5.81 ± 0.37 *  | 6.60 ± 1.08 *  | 239.63 ± 8.51 *  |
| NiCoTa                 | 40.53 ± 2.23    | 6.11 ± 0.54 *  | BD             | BD               |
| <b>12-Month Groups</b> |                 |                |                |                  |
| Group                  | Cobalt          | Nickel         | Tantalum       | Tungsten         |
| Control                | 36.26 ± 0.63    | 5.33 ± 0.23    | BD             | BD               |
| Ta                     | 33.05 ± 1.32    | 4.40 ± 0.32    | BD             | BD               |
| WTa                    | 30.61 ± 1.24 *  | 4.68 ± 0.45    | BD             | 133.17 ± 6.41 *  |
| NiTa                   | 42.22 ± 0.74 *  | 5.62 ± 0.71    | BD             | BD               |
| CoTa                   | 41.79 ± 1.47 *  | 4.79 ± 0.22    | BD             | BD               |
| WNiTa                  | 12.14 ± 0.62 *  | 3.31 ± 0.34 *  | 3.76 ± 0.49 *  | 66.68 ± 4.11 *   |
| WCoTa                  | 70.00 ± 4.20 *  | 4.87 ± 0.50    | 13.93 ± 1.63 * | 199.45 ± 7.81 *  |
| NiCoTa                 | 58.41 ± 35.54 * | 3.04 ± 0.80 *  | BD             | BD               |
| <b>24-Month Groups</b> |                 |                |                |                  |
| Group                  | Cobalt          | Nickel         | Tantalum       | Tungsten         |
| Control                | 35.09 ± 5.41    | 23.87 ± 1.95   | BD             | BD               |
| Ta                     | 43.73 ± 1.69    | 21.34 ± 1.65   | BD             | BD               |
| WTa                    | 42.51 ± 1.80    | 17.49 ± 1.79 * | BD             | 156.63 ± 17.27 * |
| NiTa                   | 42.51 ± 2.83    | 12.86 ± 1.45 * | BD             | BD               |
| CoTa                   | 46.33 ± 2.85    | 22.50 ± 2.41   | BD             | BD               |
| WNiTa                  | 46.43 ± 2.58    | 21.18 ± 1.27   | 1.59 ± 0.21    | 73.78 ± 4.43 *   |
| WCoTa                  | 47.68 ± 5.68    | 14.46 ± 1.33 * | 2.71 ± 0.49 *  | 131.86 ± 12.14 * |
| NiCoTa                 | 35.07 ± 5.34    | 11.59 ± 0.82 * | BD             | BD               |

All mice were implanted with 4 pellets of test metal. Data represent the mean and standard error of the mean of 10 independent measurements and are expressed as ng metal per g tissue. An \* indicates a result that is statistically different from the control (sham) at  $p < 0.05$  using one-way ANOVA. BD, below the limit of detection.



**Table S14.** Liver metal levels.

| <b>1-Month Groups</b>  |                 |                  |                |                  |
|------------------------|-----------------|------------------|----------------|------------------|
| Group                  | Cobalt          | Nickel           | Tantalum       | Tungsten         |
| Control                | 29.57 ± 1.73    | 17.00 ± 3.31     | BD             | 2.66 ± 0.68      |
| Ta                     | 25.49 ± 3.53    | 24.95 ± 8.68     | BD             | BD               |
| WTa                    | 9.23 ± 0.74 *   | 13.22 ± 1.69     | BD             | 34.90 ± 3.56 *   |
| NiTa                   | 8.02 ± 0.59 *   | 17.05 ± 2.42     | BD             | BD               |
| CoTa                   | 8.13 ± 0.35 *   | 25.97 ± 2.55     | BD             | BD               |
| WNIa                   | 9.39 ± 0.32 *   | 39.13 ± 4.64 *   | BD             | 12.14 ± 0.80 *   |
| WCoTa                  | 80.74 ± 14.85 * | 63.49 ± 4.96 *   | BD             | 66.86 ± 14.51 *  |
| NiCoTa                 | 19.09 ± 1.71 *  | 148.32 ± 15.56 * | BD             | BD               |
| <b>3-Month Groups</b>  |                 |                  |                |                  |
| Group                  | Cobalt          | Nickel           | Tantalum       | Tungsten         |
| Control                | 11.12 ± 0.25    | 8.38 ± 1.09      | BD             | BD               |
| Ta                     | 9.26 ± 0.19     | 6.20 ± 0.80 *    | BD             | BD               |
| WTa                    | 8.00 ± 0.25 *   | 16.00 ± 1.48 *   | BD             | 39.89 ± 2.88 *   |
| NiTa                   | 7.51 ± 0.18 *   | 2.82 ± 0.26 *    | BD             | BD               |
| CoTa                   | 8.37 ± 0.30 *   | 5.34 ± 1.14 *    | BD             | BD               |
| WNIa                   | 10.12 ± 0.11    | 20.58 ± 1.67 *   | BD             | 30.30 ± 1.49 *   |
| WCoTa                  | 62.36 ± 1.90 *  | 16.28 ± 0.72 *   | 3.77 ± 0.80 *  | 152.15 ± 12.79 * |
| NiCoTa                 | 11.90 ± 0.28    | 23.80 ± 1.86 *   | BD             | BD               |
| <b>6-Month Groups</b>  |                 |                  |                |                  |
| Group                  | Cobalt          | Nickel           | Tantalum       | Tungsten         |
| Control                | 9.83 ± 0.22     | 3.62 ± 0.49      | BD             | BD               |
| Ta                     | 8.77 ± 0.12     | 2.31 ± 0.06      | BD             | BD               |
| WTa                    | 8.34 ± 0.09     | 4.47 ± 0.46      | 2.12 ± 0.41    | 51.03 ± 5.35 *   |
| NiTa                   | 8.77 ± 0.15     | 5.12 ± 0.62      | BD             | BD               |
| CoTa                   | 8.27 ± 0.29     | 18.39 ± 2.87 *   | BD             | BD               |
| WNIa                   | 9.23 ± 0.25     | 6.46 ± 0.54 *    | BD             | 32.00 ± 1.48 *   |
| WCoTa                  | 40.10 ± 1.50 *  | 3.89 ± 0.46      | 16.09 ± 2.26 * | 119.66 ± 5.47 *  |
| NiCoTa                 | 8.52 ± 0.13     | 3.73 ± 0.14      | BD             | BD               |
| <b>12-Month Groups</b> |                 |                  |                |                  |
| Group                  | Cobalt          | Nickel           | Tantalum       | Tungsten         |
| Control                | 7.03 ± 0.20     | 6.76 ± 0.48      | BD             | BD               |
| Ta                     | 8.22 ± 0.20 *   | 7.90 ± 0.99      | BD             | BD               |
| WTa                    | 8.48 ± 0.19 *   | 9.07 ± 0.88      | 3.09 ± 0.47 *  | 74.36 ± 8.22 *   |
| NiTa                   | 9.16 ± 0.27 *   | 12.62 ± 1.22 *   | 7.00 ± 0.40 *  | BD               |
| CoTa                   | 9.22 ± 0.11 *   | 12.17 ± 0.83 *   | 3.78 ± 0.20    | BD               |
| WNIa                   | 8.69 ± 0.20 *   | 8.39 ± 1.17      | 23.03 ± 2.76 * | 23.35 ± 2.42 *   |
| WCoTa                  | 24.54 ± 1.34 *  | 7.57 ± 0.91      | 74.83 ± 4.97 * | 96.69 ± 8.90 *   |
| NiCoTa                 | 8.77 ± 0.15 *   | 8.58 ± 1.03      | BD             | BD               |

**Table S14. Cont.**

| <b>24-Month Groups</b> |                |                |                |                |
|------------------------|----------------|----------------|----------------|----------------|
| Group                  | Cobalt         | Nickel         | Tantalum       | Tungsten       |
| Control                | 8.62 ± 0.27    | 37.52 ± 1.53   | BD             | BD             |
| Ta                     | 9.77 ± 0.16 *  | 45.25 ± 4.85   | BD             | BD             |
| WTa                    | 9.39 ± 0.14 *  | 38.52 ± 5.59   | 2.47 ± 0.65    | 69.02 ± 7.51 * |
| NiTa                   | 8.95 ± 0.42    | 19.57 ± 2.11 * | BD             | BD             |
| CoTa                   | 10.33 ± 0.27 * | 27.47 ± 3.96 * | BD             | BD             |
| WNiTa                  | 8.52 ± 0.31    | 14.92 ± 1.43 * | 3.33 ± 0.70 *  | 18.92 ± 1.57 * |
| WCoTa                  | 12.15 ± 0.41 * | 19.77 ± 2.90 * | 14.15 ± 1.82 * | 35.34 ± 5.58 * |
| NiCoTa                 | 9.81 ± 0.45 *  | 19.89 ± 1.15 * | BD             | BD             |

All mice were implanted with 4 pellets of test metal. Data represent the mean and standard error of the mean of 10 independent measurements and are expressed as ng metal per g tissue. An \* indicates a result that is statistically different from the control (sham) at  $p < 0.05$  using one-way ANOVA. BD, below the limit of detection.

**Table S15. Serum metal levels.**

| <b>1-Month Groups</b> |                |                |          |                |
|-----------------------|----------------|----------------|----------|----------------|
| Group                 | Cobalt         | Nickel         | Tantalum | Tungsten       |
| Control               | BD             | BD             | BD       | BD             |
| Ta                    | BD             | 18.44 ± 1.94 * | BD       | BD             |
| WTa                   | BD             | 12.91 ± 2.95 * | BD       | 17.88 ± 1.07 * |
| NiTa                  | BD             | 11.20 ± 2.19 * | BD       | BD             |
| CoTa                  | BD             | 8.44 ± 0.92 *  | BD       | BD             |
| WNiTa                 | BD             | 18.83 ± 1.05 * | BD       | 5.44 ± 0.36 *  |
| WCoTa                 | 20.30 ± 2.29 * | 5.02 ± 1.32 *  | BD       | 35.65 ± 2.34 * |
| NiCoTa                | BD             | BD             | BD       | BD             |
| <b>3-Month Groups</b> |                |                |          |                |
| Group                 | Cobalt         | Nickel         | Tantalum | Tungsten       |
| Control               | BD             | BD             | BD       | BD             |
| Ta                    | BD             | BD             | BD       | BD             |
| WTa                   | BD             | BD             | BD       | 7.23 ± 0.59 *  |
| NiTa                  | BD             | 3.82 ± 0.82 *  | BD       | BD             |
| CoTa                  | BD             | 4.73 ± 1.09 *  | BD       | BD             |
| WNiTa                 | BD             | 4.00 ± 0.29 *  | BD       | 6.19 ± 0.42 *  |
| WCoTa                 | 6.46 ± 0.89 *  | 4.72 ± 0.56 *  | BD       | 39.32 ± 3.72 * |
| NiCoTa                | BD             | 7.37 ± 1.69 *  | BD       | BD             |
| <b>6-Month Groups</b> |                |                |          |                |
| Group                 | Cobalt         | Nickel         | Tantalum | Tungsten       |
| Control               | BD             | BD             | BD       | BD             |
| Ta                    | BD             | BD             | BD       | BD             |
| WTa                   | BD             | 2.33 ± 0.14    | BD       | 6.59 ± 0.22 *  |
| NiTa                  | BD             | 3.20 ± 0.31 *  | BD       | BD             |
| CoTa                  | BD             | 1.85 ± 0.22    | BD       | BD             |
| WNiTa                 | BD             | 1.72 ± 0.21    | BD       | 4.57 ± 0.43 *  |
| WCoTa                 | 7.04 ± 0.91 *  | 2.44 ± 0.19    | BD       | 35.06 ± 2.21 * |
| NiCoTa                | BD             | 2.22 ± 0.12    | BD       | BD             |

**Table S15. Cont.**

| <b>12-Month Groups</b> |             |                |          |                |
|------------------------|-------------|----------------|----------|----------------|
| Group                  | Cobalt      | Nickel         | Tantalum | Tungsten       |
| Control                | BD          | 7.33 ± 0.54    | BD       | BD             |
| Ta                     | BD          | 9.26 ± 1.43    | BD       | BD             |
| WTa                    | BD          | 6.97 ± 1.58    | BD       | 8.70 ± 0.55 *  |
| NiTa                   | BD          | 3.01 ± 0.84 *  | BD       | BD             |
| CoTa                   | BD          | 2.26 ± 0.50 *  | BD       | BD             |
| WNIa                   | BD          | BD             | BD       | 4.03 ± 0.57 *  |
| WCoTa                  | 2.13 ± 0.28 | BD             | BD       | 25.76 ± 3.29 * |
| NiCoTa                 | BD          | BD             | BD       | BD             |
| <b>24-Month Groups</b> |             |                |          |                |
| Group                  | Cobalt      | Nickel         | Tantalum | Tungsten       |
| Control                | BD          | 26.09 ± 3.87   | BD       | BD             |
| Ta                     | BD          | 21.14 ± 3.08   | BD       | BD             |
| WTa                    | BD          | 14.75 ± 1.74 * | BD       | 8.92 ± 0.89 *  |
| NiTa                   | BD          | 16.46 ± 1.62 * | BD       | BD             |
| CoTa                   | BD          | 8.41 ± 0.83 *  | BD       | BD             |
| WNIa                   | BD          | 10.47 ± 1.60 * | BD       | 3.80 ± 0.50 *  |
| WCoTa                  | BD          | 15.35 ± 2.00 * | BD       | 6.90 ± 1.34 *  |
| NiCoTa                 | BD          | 8.46 ± 0.93 *  | BD       | BD             |

All mice were implanted with 4 pellets of test metal. Data represent the mean and standard error of the mean of 10 independent measurements and are expressed as ng metal per ml serum. An \* indicates a result that is statistically different from the control (sham) at  $p < 0.05$  using one-way ANOVA. BD, below the limit of detection.

**Table S16. Spleen metal levels.**

| <b>1-Month Groups</b> |                |                  |                |                  |
|-----------------------|----------------|------------------|----------------|------------------|
| Group                 | Cobalt         | Nickel           | Tantalum       | Tungsten         |
| Control               | 3.04 ± 0.29    | 51.66 ± 8.49     | BD             | BD               |
| Ta                    | 2.65 ± 0.12    | 41.64 ± 5.77     | BD             | BD               |
| WTa                   | 2.11 ± 0.16    | BD               | BD             | 109.61 ± 3.84 *  |
| NiTa                  | 2.25 ± 0.14    | 6.49 ± 2.41 *    | BD             | BD               |
| CoTa                  | 2.96 ± 0.57    | BD               | BD             | BD               |
| WNIa                  | 2.25 ± 0.09    | 24.55 ± 3.50 *   | BD             | 21.42 ± 2.03 *   |
| WCoTa                 | 27.21 ± 1.56 * | 22.79 ± 3.89 *   | BD             | 243.32 ± 15.83   |
| NiCoTa                | 11.40 ± 1.19 * | 211.09 ± 22.86 * | 1.83 ± 0.49    | BD               |
| <b>3-Month Groups</b> |                |                  |                |                  |
| Group                 | Cobalt         | Nickel           | Tantalum       | Tungsten         |
| Control               | 2.54 ± 0.25    | 29.88 ± 4.31     | BD             | BD               |
| Ta                    | 2.37 ± 0.09    | 36.19 ± 6.55     | BD             | BD               |
| WTa                   | 3.15 ± 0.08 *  | 122.63 ± 19.72 * | 7.19 ± 0.58 *  | 305.43 ± 27.63 * |
| NiTa                  | 2.92 ± 0.17    | 79.13 ± 18.03 *  | 4.60 ± 0.37 *  | BD               |
| CoTa                  | 2.97 ± 0.12    | 70.88 ± 8.45 *   | BD             | BD               |
| WNIa                  | 3.14 ± 0.20    | 115.32 ± 17.44 * | 6.36 ± 0.86 *  | 182.61 ± 11.82 * |
| WCoTa                 | 21.21 ± 0.94 * | 55.40 ± 11.94    | 19.42 ± 2.26 * | 699.35 ± 86.11 * |
| NiCoTa                | 3.29 ± 0.16 *  | 133.28 ± 11.66 * | BD             | BD               |

**Table S16. Cont.**

| <b>6-Month Groups</b>  |                |                  |                |                   |
|------------------------|----------------|------------------|----------------|-------------------|
| Group                  | Cobalt         | Nickel           | Tantalum       | Tungsten          |
| Control                | 2.48 ± 0.17    | 15.28 ± 2.55     | BD             | BD                |
| Ta                     | 2.53 ± 0.32    | 12.09 ± 2.17     | 1.85 ± 0.33    | BD                |
| WTa                    | 3.66 ± 0.06 *  | 110.82 ± 26.72 * | 16.33 ± 1.51 * | 431.77 ± 32.83 *  |
| NiTa                   | 3.13 ± 0.14 *  | 46.41 ± 9.52 *   | 8.46 ± 0.99 *  | BD                |
| CoTa                   | 2.78 ± 0.09    | 60.76 ± 9.50 *   | 2.24 ± 0.18 *  | BD                |
| WNiTa                  | 3.63 ± 0.40 *  | 120.67 ± 22.39 * | 9.40 ± 1.62 *  | 221.49 ± 17.57 *  |
| WCoTa                  | 20.32 ± 0.85 * | 124.26 ± 18.70 * | 41.03 ± 2.12 * | 882.81 ± 59.11 *  |
| NiCoTa                 | 4.83 ± 0.41    | 125.43 ± 22.80 * | BD             | BD                |
| <b>12-Month Groups</b> |                |                  |                |                   |
| Group                  | Cobalt         | Nickel           | Tantalum       | Tungsten          |
| Control                | 3.10 ± 0.23    | 45.47 ± 5.70     | BD             | BD                |
| Ta                     | 2.86 ± 0.25    | 25.65 ± 3.59 *   | BD             | BD                |
| WTa                    | 4.86 ± 0.51 *  | 87.81 ± 20.75    | 2.03 ± 0.07    | 376.88 ± 15.52 *  |
| NiTa                   | 2.76 ± 0.11    | 71.10 ± 19.80    | 10.42 ± 0.81 * | BD                |
| CoTa                   | 2.83 ± 0.15    | 35.85 ± 6.84     | 5.33 ± 0.53 *  | BD                |
| WNiTa                  | 3.09 ± 0.10    | 81.49 ± 19.84    | 26.71 ± 3.38 * | 273.75 ± 40.85 *  |
| WCoTa                  | 15.49 ± 0.36 * | 59.22 ± 8.29     | 79.20 ± 9.08 * | 1035.43 ± 98.79 * |
| NiCoTa                 | 3.33 ± 0.15    | 84.70 ± 17.66 *  | 1.87 ± 0.19    | BD                |
| <b>24-Month Groups</b> |                |                  |                |                   |
| Group                  | Cobalt         | Nickel           | Tantalum       | Tungsten          |
| Control                | 3.39 ± 0.29    | 63.03 ± 5.92     | BD             | BD                |
| Ta                     | 3.11 ± 0.26    | 70.37 ± 9.20     | BD             | BD                |
| WTa                    | 2.50 ± 0.12    | 68.81 ± 12.35    | BD             | 200.22 ± 38.57 *  |
| NiTa                   | 2.56 ± 0.40    | 44.65 ± 6.74     | BD             | BD                |
| CoTa                   | 2.24 ± 0.19    | 62.99 ± 10.18    | BD             | BD                |
| WNiTa                  | 2.71 ± 0.19    | 113.71 ± 14.44 * | BD             | 90.57 ± 11.08 *   |
| WCoTa                  | 4.68 ± 0.58    | 59.95 ± 8.50     | BD             | 58.20 ± 11.45 *   |
| NiCoTa                 | 2.58 ± 0.05    | 40.99 ± 3.74 *   | BD             | BD                |

All mice were implanted with 4 pellets of test metal. Data represent the mean and standard error of the mean of 10 independent measurements and are expressed as ng metal per g tissue. An \* indicates a result that is statistically different from the control (sham) at  $p < 0.05$  using one-way ANOVA. BD, below the limit of detection.

**Table S17. Testes metal levels.**

| <b>1-Month Groups</b> |        |        |          |          |
|-----------------------|--------|--------|----------|----------|
| Group                 | Cobalt | Nickel | Tantalum | Tungsten |
| Control               | ND     | ND     | ND       | ND       |
| Ta                    | ND     | ND     | ND       | ND       |
| WTa                   | ND     | ND     | ND       | ND       |
| NiTa                  | ND     | ND     | ND       | ND       |
| CoTa                  | ND     | ND     | ND       | ND       |
| WNiTa                 | ND     | ND     | ND       | ND       |
| WCoTa                 | ND     | ND     | ND       | ND       |
| NiCoTa                | ND     | ND     | ND       | ND       |

**Table S17. Cont.**

| <b>3-Month Groups</b>  |                |                |                |                |
|------------------------|----------------|----------------|----------------|----------------|
| Group                  | Cobalt         | Nickel         | Tantalum       | Tungsten       |
| Control                | 5.10 ± 0.12    | 7.07 ± 0.55    | BD             | BD             |
| Ta                     | 4.55 ± 0.06    | 5.86 ± 0.83    | BD             | BD             |
| WTa                    | 5.32 ± 0.11    | 20.66 ± 6.38   | 3.94 ± 0.44 *  | 17.63 ± 1.35 * |
| NiTa                   | 5.44 ± 0.05    | 26.93 ± 5.14 * | 3.23 ± 0.19 *  | BD             |
| CoTa                   | 5.24 ± 0.07    | 22.12 ± 5.10 * | BD             | BD             |
| WNiTa                  | 5.40 ± 0.09    | 34.62 ± 4.89 * | 4.82 ± 0.35 *  | 12.00 ± 0.80 * |
| WCoTa                  | 14.92 ± 0.29 * | 28.88 ± 6.62 * | 16.65 ± 1.68 * | 56.23 ± 3.70 * |
| NiCoTa                 | 5.22 ± 0.06    | 20.78 ± 5.17 * | BD             | BD             |
| <b>6-Month Groups</b>  |                |                |                |                |
| Group                  | Cobalt         | Nickel         | Tantalum       | Tungsten       |
| Control                | 4.92 ± 0.15    | 3.38 ± 0.32    | BD             | BD             |
| Ta                     | 5.36 ± 0.11    | 3.05 ± 0.17    | BD             | BD             |
| WTa                    | 5.52 ± 0.09    | 7.85 ± 1.77 *  | 10.72 ± 0.53 * | 24.83 ± 1.61 * |
| NiTa                   | 5.71 ± 0.12    | 7.53 ± 2.21    | 3.35 ± 0.32 *  | BD             |
| CoTa                   | 5.04 ± 0.10    | 21.48 ± 4.16 * | BD             | BD             |
| WNiTa                  | 5.81 ± 0.14    | 14.94 ± 3.45 * | 5.84 ± 0.77 *  | 18.22 ± 0.83 * |
| WCoTa                  | 14.78 ± 0.34 * | 19.51 ± 5.41 * | 19.67 ± 3.79 * | 67.68 ± 2.65 * |
| NiCoTa                 | 5.67 ± 0.18    | 25.25 ± 6.79 * | BD             | BD             |
| <b>12-Month Groups</b> |                |                |                |                |
| Group                  | Cobalt         | Nickel         | Tantalum       | Tungsten       |
| Control                | 5.62 ± 0.19    | 11.85 ± 0.54   | BD             | BD             |
| Ta                     | 5.57 ± 0.20    | 17.30 ± 2.80   | BD             | BD             |
| WTa                    | 6.49 ± 0.20    | 13.51 ± 1.70   | BD             | 38.75 ± 3.42 * |
| NiTa                   | 6.26 ± 0.21    | 9.68 ± 0.68    | 5.49 ± 0.39 *  | BD             |
| CoTa                   | 6.27 ± 0.20    | 11.19 ± 0.94   | 2.32 ± 0.17 *  | BD             |
| WNiTa                  | 5.68 ± 0.12    | 5.28 ± 0.58 *  | 11.58 ± 2.09 * | 19.33 ± 1.93 * |
| WCoTa                  | 12.97 ± 0.37 * | 5.99 ± 0.98 *  | 35.88 ± 5.11 * | 76.60 ± 3.95 * |
| NiCoTa                 | 5.31 ± 0.11    | 4.35 ± 0.92 *  | BD             | BD             |
| <b>24-Month Groups</b> |                |                |                |                |
| Group                  | Cobalt         | Nickel         | Tantalum       | Tungsten       |
| Control                | 5.78 ± 0.23    | 62.72 ± 2.81   | BD             | BD             |
| Ta                     | 6.24 ± 0.46    | 63.59 ± 4.26   | BD             | BD             |
| WTa                    | 7.42 ± 0.28    | 69.43 ± 3.36   | 8.53 ± 1.54 *  | 52.64 ± 5.84 * |
| NiTa                   | 6.61 ± 0.26    | 47.78 ± 5.75 * | BD             | BD             |
| CoTa                   | 6.71 ± 0.17    | 32.77 ± 2.52 * | BD             | BD             |
| WNiTa                  | 6.19 ± 0.47    | 39.35 ± 3.22 * | 9.16 ± 1.63 *  | 31.46 ± 2.86 * |
| WCoTa                  | 11.19 ± 0.34 * | 31.48 ± 4.62 * | 38.91 ± 7.38 * | 41.03 ± 4.07 * |
| NiCoTa                 | 6.19 ± 0.47    | 19.94 ± 1.24 * | BD             | BD             |

All mice were implanted with 4 pellets of test metal. Data represent the mean and standard error of the mean of 10 independent measurements and are expressed as ng metal per g tissue. An \* indicates a result that is statistically different from the control (sham) at  $p < 0.05$  using one-way ANOVA. BD, below the limit of detection. ND, not determined.

**Table S18.** Urine metal levels.

| <b>1-Month Groups</b>  |                     |                     |                   |                          |
|------------------------|---------------------|---------------------|-------------------|--------------------------|
| Group                  | Cobalt              | Nickel              | Tantalum          | Tungsten                 |
| Control                | 529.52 ± 92.40      | 7038.55 ± 1375.79   | 515.02 ± 114.08   | 711.84 ± 188.11          |
| Ta                     | 126.35 ± 14.38 *    | 2373.97 ± 357.72 *  | 278.43 ± 49.34    | 183.41 ± 27.20 *         |
| WTa                    | 72.74 ± 8.84 *      | 512.88 ± 53.70 *    | 361.43 ± 46.11    | 42,038.20 ± 6061.62 *    |
| NiTa                   | 84.70 ± 9.31 *      | 493.55 ± 262.60 *   | 704.16 ± 163.55   | 936.09 ± 178.05          |
| CoTa                   | 127.14 ± 21.20 *    | 1046.35 ± 299.18 *  | 661.70 ± 244.10   | 652.87 ± 129.09          |
| WNIa                   | 140.82 ± 17.26 *    | 9919.40 ± 1453.34 * | 326.26 ± 59.46    | 16,245.53 ± 3090.67 *    |
| WCoTa                  | 4949.43 ± 663.44 *  | 795.18 ± 139.84 *   | 307.76 ± 47.31    | 90,057.41 ± 13,901.72 *  |
| NiCoTa                 | 113.90 ± 17.84 *    | 885.88 ± 84.00 *    | 139.77 ± 23.71 *  | 39.91 ± 14.05 *          |
| <b>3-Month Groups</b>  |                     |                     |                   |                          |
| Group                  | Cobalt              | Nickel              | Tantalum          | Tungsten                 |
| Control                | 145.18 ± 37.30      | 4658.99 ± 1174.54   | 132.34 ± 38.81    | BD                       |
| Ta                     | 67.96 ± 17.50       | 1442.55 ± 477.04    | 50.07 ± 13.17     | BD                       |
| WTa                    | 87.08 ± 15.20       | 1649.12 ± 400.65    | 84.43 ± 12.49     | 37,004.38 ± 5200.32 *    |
| NiTa                   | 98.81 ± 23.26       | 1710.88 ± 653.25    | 74.29 ± 19.95     | BD                       |
| CoTa                   | 95.41 ± 26.54       | 650.95 ± 188.22 *   | 26.68 ± 4.63 *    | BD                       |
| WNIa                   | 97.31 ± 27.24       | 3326.19 ± 836.73    | 77.45 ± 16.12     | 35,229.64 ± 6566.33 *    |
| WCoTa                  | 3947.50 ± 1477.85 * | 2062.42 ± 853.71    | 438.68 ± 119.70 * | 332,719.59 ± 18,890.27 * |
| NiCoTa                 | 69.27 ± 21.00       | 1001.72 ± 245.92 *  | 16.48 ± 4.30 *    | BD                       |
| <b>6-Month Groups</b>  |                     |                     |                   |                          |
| Group                  | Cobalt              | Nickel              | Tantalum          | Tungsten                 |
| Control                | 52.63 ± 6.63        | 579.46 ± 50.95      | BD                | BD                       |
| Ta                     | 59.29 ± 5.67        | 533.21 ± 74.50      | 11.54 ± 1.92 *    | BD                       |
| WTa                    | 81.35 ± 28.26       | 1116.82 ± 234.48    | 56.94 ± 18.77 *   | 25,921.94 ± 5390.63 *    |
| NiTa                   | 66.93 ± 14.66       | 1129.47 ± 190.24    | 19.82 ± 3.65 *    | BD                       |
| CoTa                   | 67.58 ± 13.39       | 962.20 ± 165.72     | 15.97 ± 1.63 *    | BD                       |
| WNIa                   | 62.91 ± 16.06       | 945.21 ± 189.75     | 45.33 ± 11.70 *   | 21,440.46 ± 4566.34 *    |
| WCoTa                  | 793.01 ± 104.07 *   | 635.63 ± 97.50      | 142.05 ± 19.40 *  | 137,467.37 ± 22,137.54 * |
| NiCoTa                 | 40.54 ± 6.07        | 1103.62 ± 242.75    | 21.30 ± 1.40 *    | BD                       |
| <b>12 Month Groups</b> |                     |                     |                   |                          |
| Group                  | Cobalt              | Nickel              | Tantalum          | Tungsten                 |
| Control                | 111.27 ± 11.28      | 1051.19 ± 130.00    | 20.27 ± 5.07      | BD                       |
| Ta                     | 142.08 ± 19.99      | 978.96 ± 35.09      | 21.87 ± 4.29      | BD                       |
| WTa                    | 103.42 ± 8.27       | 1440.33 ± 265.38    | 61.29 ± 6.11 *    | 55,870.49 ± 7250.50 *    |
| NiTa                   | 69.67 ± 5.52        | 760.25 ± 66.16 *    | 22.47 ± 2.04      | BD                       |
| CoTa                   | 39.75 ± 4.34        | 445.70 ± 72.38 *    | 18.30 ± 3.16      | BD                       |
| WNIa                   | 57.92 ± 6.02        | 1049.79 ± 89.74     | 27.27 ± 5.60      | 12,066.56 ± 2223.34 *    |
| WCoTa                  | 470.24 ± 77.13 *    | 1533.29 ± 295.06    | 113.49 ± 19.99 *  | 128,128.73 ± 19,993.53 * |
| NiCoTa                 | 55.28 ± 7.93        | 348.72 ± 60.82 *    | 12.89 ± 4.16      | BD                       |

Table S18. *Cont.*

| 24-Month Groups |              |                |                   |                       |
|-----------------|--------------|----------------|-------------------|-----------------------|
| Group           | Cobalt       | Nickel         | Tantalum          | Tungsten              |
| Control         | 41.79 ± 5.13 | 393.59 ± 57.71 | BD                | BD                    |
| Ta              | 30.01 ± 3.34 | 320.77 ± 29.36 | 460.78 ± 108.68 * | BD                    |
| WTa             | 38.00 ± 2.46 | 478.85 ± 46.06 | 73.33 ± 3.29 *    | 12,089.26 ± 1618.85 * |
| NiTa            | 45.16 ± 8.65 | 373.10 ± 53.91 | 58.46 ± 4.72 *    | BD                    |
| CoTa            | 26.97 ± 3.94 | 267.30 ± 34.42 | 16.24 ± 1.96 *    | BD                    |
| WNTa            | 33.78 ± 4.93 | 365.90 ± 23.52 | 59.06 ± 9.49 *    | 5782.47 ± 611.02 *    |
| WCoTa           | 55.06 ± 4.20 | 308.56 ± 28.99 | 59.66 ± 5.56 *    | 7296.71 ± 723.75 *    |
| NiCoTa          | 48.26 ± 8.98 | 392.05 ± 56.09 | 7.16 ± 3.23 *     | BD                    |

All mice were implanted with 4 pellets of test metal. Data represent the mean and standard error of the mean of 10 independent measurements and are expressed as ng metal per mg creatinine. An \* indicates a result that is statistically different from the control (sham) at  $p < 0.05$  using one-way ANOVA. BD, below the limit of detection.
